# Supplementary figures and images for: Synthesis and characterization of nanostructured MnO2–CoO and its relevance as an opto-electronic humidity sensing device
Source: Royal Society of Chemistry journal article supplement (doi:10.1039/c8ra01975d), 2018-01-01

### Supplementary information

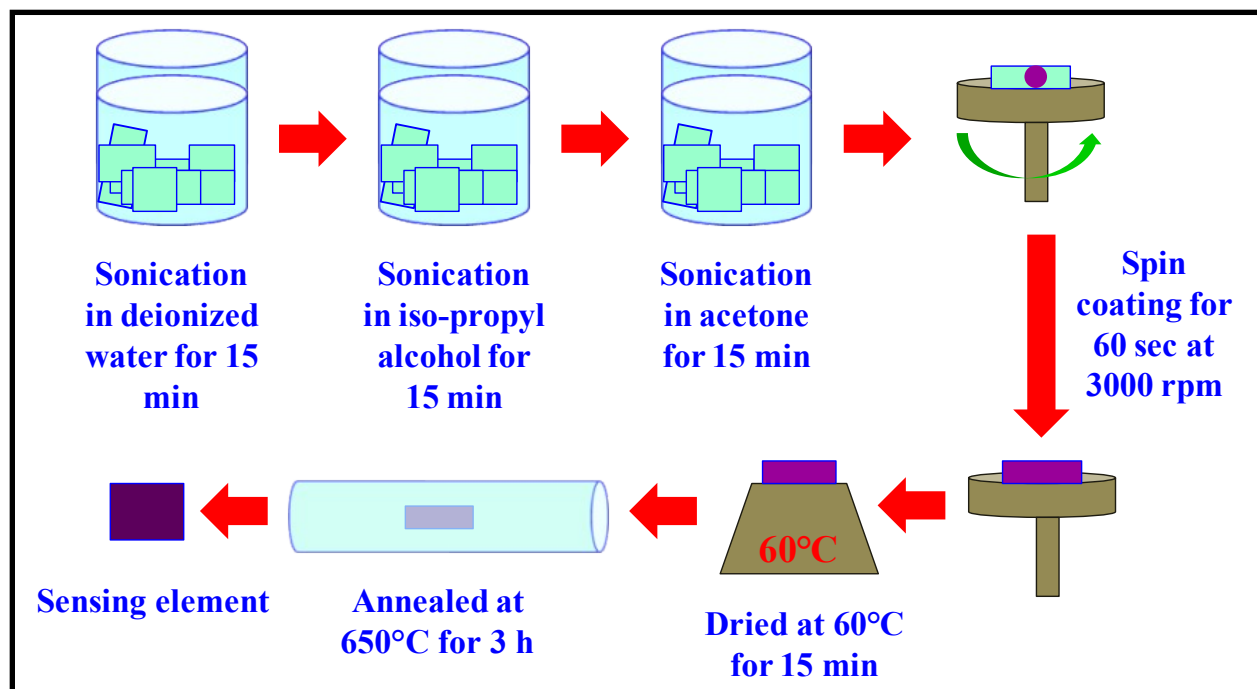

**Fig.** Schematic for fabrication of sensing element

Supplement: c8ra01975d1.pdf [file c8ra01975d1.pdf]
